# Supplementary material
Source: PubMed Central journal article supplement (PMC2713509)

## **SUPPLEMENTAL DATA**

Supplementary Fig. 1. Alignment of the UBL domains of seven different yeast proteins with CLC Sequence Viewer.

# SUPPLEMENTARY FIGURE 1

|           |                   |     |                  |        |               |      |             |            |              |              |              |              |              |              |              |              |              |              |              |              |              |    |
|-----------|-------------------|-----|------------------|--------|---------------|------|-------------|------------|--------------|--------------|--------------|--------------|--------------|--------------|--------------|--------------|--------------|--------------|--------------|--------------|--------------|----|
|           |                   |     |                  |        | 20            |      |             |            |              |              | 40           |              |              |              |              |              |              |              |              | 60           |              |    |
| Mdy2      | VHLTLKK           | -IQ | APKF             | -SIEHD | FS            | ---- | PSDT        | IL         | -----        | -----        | -----        | -----        | -----        | -----        | -----        | -----        | -----        | -----        | -----        | -----        | -----        | 36 |
| Rad23     | VSLTFKN           | -FK | KEKV             | -PL--D | LE            | ---- | PSNT        | IL         | -----        | -----        | -----        | -----        | -----        | -----        | -----        | -----        | -----        | -----        | -----        | -----        | -----        | 33 |
| Dsk2      | LNIIHKS           | -GQ | -DKW             | -EV--N | VA            | ---- | PEST        | VL         | -----        | -----        | -----        | -----        | -----        | -----        | -----        | -----        | -----        | -----        | -----        | -----        | -----        | 32 |
| Ubp6      | FEFNIRH           | --S | GKVY             | -PITLS | TD            | ---- | ATSA        | DL         | -----        | -----        | -----        | -----        | -----        | -----        | -----        | -----        | -----        | -----        | -----        | -----        | -----        | 34 |
| Ddi1      | MDLTISNELT        |     | GEIYGPIEVS       |        | ED            | ---- | MALT        | DL         | -----        | -----        | -----        | -----        | -----        | -----        | -----        | -----        | -----        | -----        | -----        | -----        | -----        | 35 |
| Ubx4      | LPTGVNLELS        |     | KSSNFPVANK       |        | TNREDI        |      | PFNT        | IKIRFQIPGR |              |              | DSVVKEMPSD   |              |              |              |              |              |              |              |              |              |              | 60 |
| Usa1      | --RFVLEFI         |     | SDATLSI          | --     | TQMNVK        |      | PDTT        | VK         | -----        | -----        | -----        | -----        | -----        | -----        | -----        | -----        | -----        | -----        | -----        | -----        | -----        | 39 |
| Consensus | <b>XXLTIKX-XX</b> |     | <b>XXKY-PI-X</b> |        | <b>TD----</b> |      | <b>PSXT</b> | <b>IL</b>  | <b>-----</b> |    |

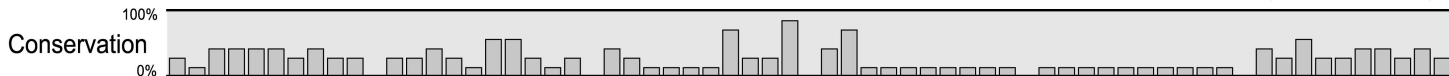

|           |                    |  |                   |             |                   |                 |                   |                   |  |  |                 |  |  |  |  |  |  |  |  |  |  |     |
|-----------|--------------------|--|-------------------|-------------|-------------------|-----------------|-------------------|-------------------|--|--|-----------------|--|--|--|--|--|--|--|--|--|--|-----|
|           |                    |  |                   |             | 80                |                 |                   |                   |  |  | 100             |  |  |  |  |  |  |  |  |  |  |     |
| Mdy2      | <b>KASHISEIKL</b>  |  | <b>LLKGVV</b>     | <b>LH--</b> | --                | <b>DNLF--LS</b> |                   | <b>DLKVTPANST</b> |  |  | <b>ITVMI--K</b> |  |  |  |  |  |  |  |  |  |  | 76  |
| Rad23     | <b>ISCEESQIKL</b>  |  | <b>IYSGKVLQ--</b> |             | --                | <b>DSKT--VS</b> |                   | <b>ECGLKDGQV</b>  |  |  | <b>V-FMV--S</b> |  |  |  |  |  |  |  |  |  |  | 72  |
| Dsk2      | <b>NGIPVANQRL</b>  |  | <b>IYSGKILK--</b> |             | --                | <b>DDQT--VE</b> |                   | <b>SYHIQDGHS-</b> |  |  | <b>VHLVK--S</b> |  |  |  |  |  |  |  |  |  |  | 71  |
| Ubp6      | -- <b>VPSARQKY</b> |  | <b>MVKGGLS--</b>  |             | --                | <b>GEES--IK</b> |                   | <b>IYPLIKPGST</b> |  |  | <b>VMLLG--T</b> |  |  |  |  |  |  |  |  |  |  | 71  |
| Ddi1      | <b>CGFDKTKHDL</b>  |  | <b>YYNMDILD--</b> |             | --                | <b>SNRTQSLK</b> |                   | <b>ELGLKT-DDL</b> |  |  | <b>LLIRG--K</b> |  |  |  |  |  |  |  |  |  |  | 76  |
| Ubx4      | <b>SGAAGDDFKI</b>  |  | <b>QVFSKIEFK</b>  |             | <b>TIKDENLTLE</b> |                 | <b>NLGIQEPSSV</b> |                   |  |  | <b>RLIFNNTS</b> |  |  |  |  |  |  |  |  |  |  | 108 |
| Usa1      | <b>LNLRRNDIKL</b>  |  | <b>IYKGQLLH--</b> |             | --                | -----           |                   | -----             |  |  | -----           |  |  |  |  |  |  |  |  |  |  | 59  |
| Consensus | <b>XGXPXDIKL</b>   |  | <b>IYKGIILH--</b> |             | --                | <b>DXET--LX</b> |                   | <b>ELGLXDXDSX</b> |  |  | <b>VLXMG--S</b> |  |  |  |  |  |  |  |  |  |  |     |

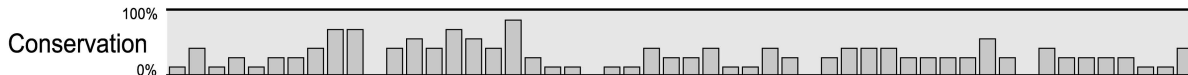

Supplement: supp_M809282200_DHWolf_Ubx4modulatesCdc48_supp.pdf [file supp_M809282200_DHWolf_Ubx4modulatesCdc48_supp.pdf]
